# Supplementary material
Source: HighWire-hosted journal article supplement (https://innovations.bmj.com/content/9/3/185)
Supplement: inline-supplementary-material-1 [file inline-supplementary-material-1.pdf]

**ANNEX****List of Indicators****A. Community-managed Group****Barangay Sto. Nino**

- Number of TB Patients in Kalinga Health from Sto. Nino
- Number of screened individuals in Kalinga Health from Sto. Nino
- Number of patients lost to follow-up in Kalinga Health from Sto. Nino
- Number of patients who completed treatment in Kalinga Health from Sto. Nino

**Barangay Industrial Valley Complex**

- Number of IVC residents who consulted Kalinga Health for TB
- Number of IVC residents diagnosed with TB in Kalinga Health
- Number of IVC residents in treatment for TB in Kalinga Health
- Number of IVC residents lost to follow-up for TB in Kalinga Health
- Number of IVC residents who completed treatment in Kalinga Health

**B. SIHI co-managed Group**

| <b>QUANTITATIVE</b>                                          |                                                                                                                          | Number of villages that utilized the indicator |
|--------------------------------------------------------------|--------------------------------------------------------------------------------------------------------------------------|------------------------------------------------|
| <b>1. Promoting a co-creative and participatory approach</b> |                                                                                                                          |                                                |
| 1.1.                                                         | Proportion of households with at least one active member (attends meetings, participates in planning and implementation) | <b>15</b>                                      |
| 1.2.                                                         | Proportion of barangay meetings held                                                                                     | <b>12</b>                                      |
| 1.3.                                                         | Proportion of barangay leaders and community members knowledgeable about SOHG (before orientation)                       | <b>10</b>                                      |
| 1.4.                                                         | Proportion of barangay leaders oriented about SOHG                                                                       | <b>10</b>                                      |
| 1.5.                                                         | Proportion of community members oriented about SOHG                                                                      | <b>7</b>                                       |
| 1.6.                                                         | Proportion of volunteers for community events related to SOHG                                                            | <b>6</b>                                       |
| 1.7.                                                         | Proportion of organizations participating in SOHG                                                                        | <b>4</b>                                       |
| 1.8.                                                         | Number of mechanisms for community participation (meetings, workshops, etc)                                              | <b>4</b>                                       |
| 1.9.                                                         | Proportion of health education activities for community members                                                          | <b>11</b>                                      |
| 1.10.                                                        | Proportion of programs specific to the youth and the marginalized sectors                                                | <b>8</b>                                       |
| 1.11.                                                        | Percent increase of awareness about the project                                                                          | <b>3</b>                                       |
| 1.12.                                                        | Proportion of developed program materials (for promotions, training, workshops) relevant to SOHG                         | <b>4</b>                                       |
| 1.13.                                                        | Number of newly-identified health-related issues or concerns during the implementation of the project                    | <b>10</b>                                      |
| 1.14.                                                        | Attendance of assigned Nurse in the barangay during the 1 <sup>st</sup> Regular Session                                  | <b>1</b>                                       |

|                                                                                                                                         |           |
|-----------------------------------------------------------------------------------------------------------------------------------------|-----------|
| <b>2. Developing leadership capacity among village leaders and community members</b>                                                    |           |
| 2.1. Proportion of training sessions conducted among community leaders/local monitors                                                   | <b>4</b>  |
| 2.1.1. Proportion of participants who attended                                                                                          | <b>7</b>  |
| 2.1.2. Proportion of community leaders who attended                                                                                     | <b>9</b>  |
| 2.1.3. Proportion of participants satisfied                                                                                             | <b>3</b>  |
| 2.1.4. Proportion of participants who were able to apply the knowledge and skills developed in the workshop to their work               | <b>3</b>  |
| 2.1.5. Percent of increase in level of knowledge of community members and community leaders                                             | <b>5</b>  |
| 2.1.6. Percent improvement of confidence in implementing and sustaining the program                                                     | <b>4</b>  |
| <b>3. Encouraging community participation to innovate and create local solutions</b>                                                    |           |
| 3.1. Proportion of community members that participate in planning and implementation of community programs                              | <b>17</b> |
| 3.2. Percentage of proposals that have been developed by community leaders and members                                                  | <b>7</b>  |
| 3.3. Proportion of organizations that have worked with the community to strengthen their organizational management                      | <b>9</b>  |
| 3.4. Proportion of technical assistance activities that have been carried out                                                           | <b>3</b>  |
| 3.5. Proportion of ongoing projects initiated and/or managed by the community                                                           | <b>7</b>  |
| 3.6. Proportion of new projects proposed by the community                                                                               | <b>9</b>  |
| 3.7. Proportion of new projects maintained by the community                                                                             | <b>6</b>  |
| <b>QUALITATIVE</b>                                                                                                                      |           |
| <b>Acceptability</b>                                                                                                                    |           |
| 1. How do community members perceive SOHG as a program? Do they perceive it as an effective means of monitoring?                        | <b>16</b> |
| 2. Do the community members believe in the objectives of SOHG?                                                                          | <b>14</b> |
| 3. Do the community members consider the merit system of SOHG as an effective means of promoting its objectives?                        | <b>12</b> |
| 4. Do the community members agree with the way SOHG is being implemented in their barangay?                                             | <b>12</b> |
| 5. Have community members that discussed SOHG with another person in the community? What were the receiver's initial thoughts about it? | <b>10</b> |
| <b>General</b>                                                                                                                          |           |
| 1. Are the project goals stated and well defined?                                                                                       | <b>11</b> |
| 2. Are relevant stakeholders involved in the development, implementation, and monitoring of the program?                                | <b>12</b> |
| 3. Are monitoring and evaluation activities progressing as planned?                                                                     | <b>4</b>  |
| 3.1. Are activities taking place on schedule at the planned frequency?                                                                  | <b>6</b>  |
| 3.2. Are training sessions being conducted as planned?                                                                                  | <b>6</b>  |
| 3.3. Are local monitors identified and recruited as planned?                                                                            | <b>3</b>  |
| 3.4. Are supplies and services needed to support the program available and affordable to the community?                                 | <b>3</b>  |
| 3.5. Are any changes in the plan needed? How will these changes be made? Who will implement them?                                       | <b>0</b>  |

|                                                                                                                                                                                                                                                                                            |    |
|--------------------------------------------------------------------------------------------------------------------------------------------------------------------------------------------------------------------------------------------------------------------------------------------|----|
| 4. Are initially posed M&E questions being sufficiently answered? Is other data needed to answer these questions? Are there any methodological issues that need to be addressed or changes that need to be made to the evaluation designs?                                                 | 7  |
| 5. Are there any factors that need to be considered in the M&E activities yet to be implemented?                                                                                                                                                                                           | 4  |
| 6. How are findings so far from the M&E activities being used and disseminated? Does anything need to be done to enhance their application to the project?                                                                                                                                 | 5  |
| 7. Are the same key messages being conveyed to the target population in the various approaches and channels?                                                                                                                                                                               | 4  |
| 8. Are messages adequately coordinated with other departments/groups and other communication activities?                                                                                                                                                                                   | 4  |
| <b>Community Mobilization</b>                                                                                                                                                                                                                                                              |    |
| 1. Type and coverage of community-based initiatives (e.g. drama, school events, cooking sessions, radio programs, etc.) utilized.                                                                                                                                                          | 10 |
| 2. Has the process of developing a community action plan been participatory and involved a wide variety of stakeholders?<br><ul style="list-style-type: none"> <li>○ Community leaders</li> <li>○ Community members</li> <li>○ Members of the LGU</li> <li>○ Members of the RHU</li> </ul> | 14 |
| <ul style="list-style-type: none"> <li>○ Concerned agencies/departments (for implementing ordinances such as RPO, Health and Sanitation, etc)</li> </ul>                                                                                                                                   |    |
| 3. What was the community's response to the events for SOHG?                                                                                                                                                                                                                               | 10 |
| 4. Are the messages appropriate considering the local situation and the changing attitudes in the community?                                                                                                                                                                               | 6  |
| 5. Are the changing needs of the audience being captured?                                                                                                                                                                                                                                  | 4  |
| 6. Do the messages appeal to the target audience's perceived needs, beliefs, concerns, attitudes, present practices, and readiness to change?                                                                                                                                              | 4  |
| 7. Were there new health issues or concerns identified by the community? What action points or solutions were put in place to solve these? Were the community members satisfied at how these issues were resolved?                                                                         | 8  |
| 8. Is administrative support and technical assistance available to them?                                                                                                                                                                                                                   | 6  |
| 9. Is there a feedback mechanism in place? How many health-related reports have been identified and reported in the past month? How were these responded to? How did it affect the community in terms of awareness? Were community members satisfied with how these issues were resolved?  | 6  |
